# Supplementary material for: Antibiotic synergist OM19r reverses aminoglycoside resistance in multidrug-resistant Escherichia coli
Source: PubMed Central journal article supplement (PMC10151501; doi:10.3389/fmicb.2023.1144946), 2023-04-18
Supplement: Data_Sheet_1.pdf [file Data_Sheet_1.pdf]

## Supplementary Material

# Antibiotic synergist OM19r Reverses Aminoglycoside Resistance in Multidrug-Resistant *Escherichia coli*

Qi Cui<sup>1†</sup>, Han-Dong Yu<sup>2†</sup>, Qi-Jun Xu<sup>2</sup>, Yue Liu<sup>1</sup>, Yu-Ting Wang<sup>1</sup>, Peng-Hui Li<sup>2</sup>, Ling-Cong Kong<sup>2</sup>, Hai-Peng Zhang<sup>1</sup>, Xiu-Yun Jiang<sup>1</sup>, Anna Maria Giuliodori<sup>3</sup>, Attilio Fabbretti<sup>3</sup>, Cheng-Guang He<sup>1\*</sup> and Hong-Xia Ma<sup>1,2\*</sup>

\* Correspondence: Hong-Xia Ma: hongxia0731001@163.com,

Cheng- Guang He: hechenguang@163.com

## 1 Supplementary Figures and Tables

### 1.1 Supplementary Figures

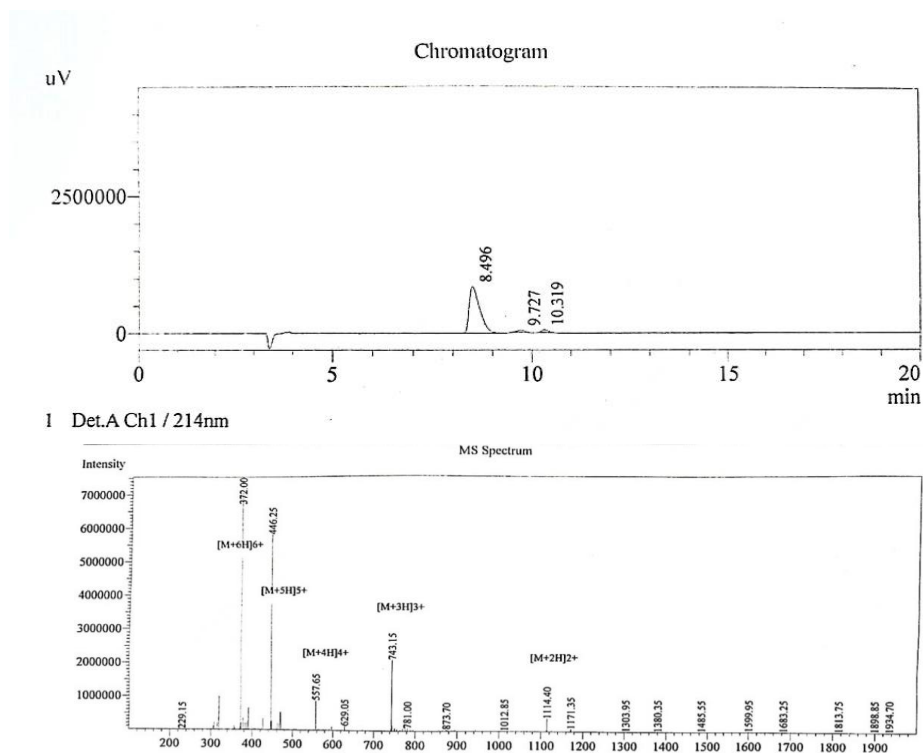

**Figure. S1** The synthetic mass spectrum of antimicrobial peptide OM19r

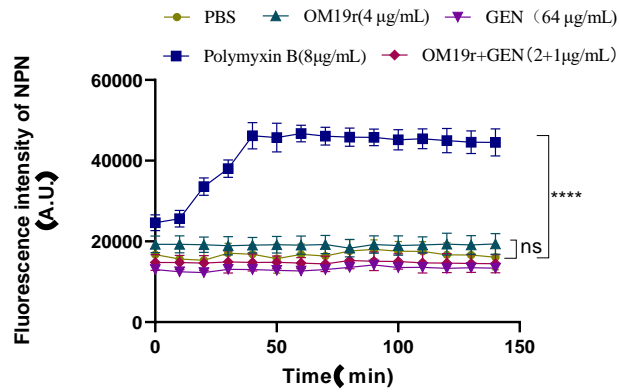

**Figure. S2** Outer membrane permeability dynamics probed by NPN. All experiments were performed as three biologically independent experiments and mean  $\pm$  SD are shown. P-values were determined using an unpaired two-tailed Student's t-test.

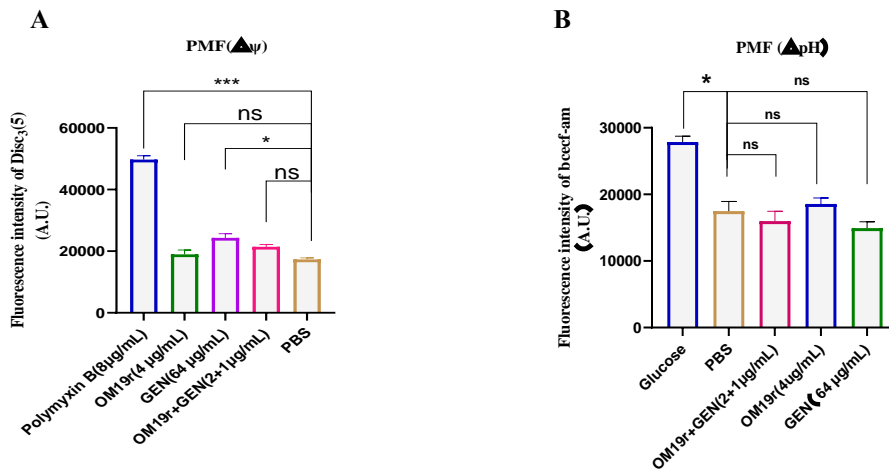

**Figure S3.** Effect of OM19r combined with GEN on PMF of *E. coli* B2. A, Dynamic changes in  $\Delta\phi$  of *E. coli* B2 were determined by 3, 3-dipropylthiodicyanide dis3 (5). B, Dynamic changes in  $\Delta\text{pH}$  of *E. coli* B2 were determined by BCECF-AM. Graphs showed the mean of three biological replicates, P-values were determined using an unpaired two-tailed Student's t-test.

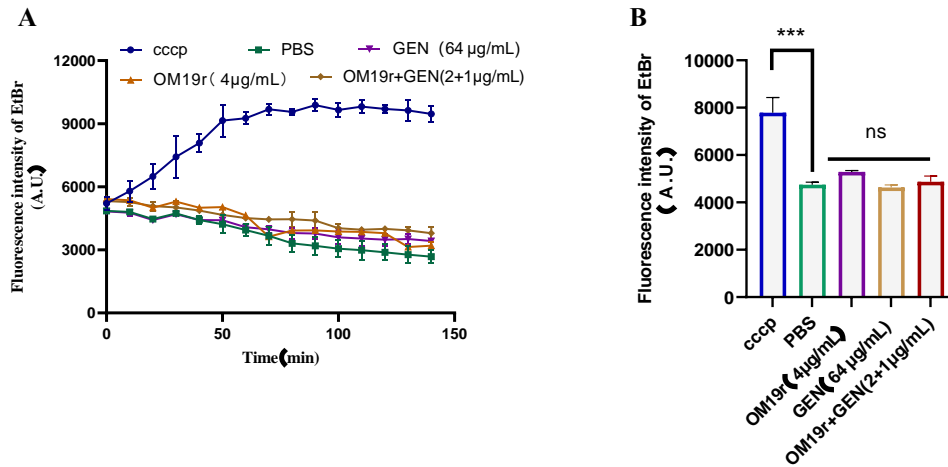

**Figure S4. Effect of OM19r combined with GEN on Efflux pump of *E. coli* B2.** A, Dynamic changes in Efflux pump of *E. coli* B2 were determined by EtBr, fluorescence intensity was detected every 10 minutes for 150 minutes. B, Dynamic changes in Efflux pump of *E. coli* B2 were determined by EtBr at 30 min. Graphs showed the mean of three biological replicates, P-values were determined using an unpaired two-tailed Student's t-test.

## 1.2 Supplementary Tables

**Table S1. MIC of different antimicrobial peptides against *E. coli* ( $\mu\text{g/mL}$ )**

| Antimicrobial peptide | <i>E. coli</i> ATCC25922 | <i>E. coli</i> B2 |
|-----------------------|--------------------------|-------------------|
| OM19r                 | 1                        | 4                 |
| OM19R                 | 1                        | 4                 |
| MB7R                  | 2                        | 4                 |
| MB19                  | 2                        | 4                 |
| LR <sub>PG</sub>      | 2                        | 8                 |
| LR <sub>GG</sub>      | 2                        | 4                 |
| LR $\alpha$           | 2                        | 4                 |

**Table S2. FIC of different antimicrobial peptides combined with gentamicin against *E. coli* B2 ( $\mu\text{g/mL}$ )**

| Antimicrobial peptide | FIC   |
|-----------------------|-------|
| OM19r                 | 0.156 |
| OM19R                 | 0.425 |
| MB7R                  | 1     |
| MB19                  | 1     |
| LR <sub>PG</sub>      | 0.5   |
| LR <sub>GG</sub>      | 0.5   |
| LR $\alpha$           | 0.375 |

**Table S3. MIC of hybrid antimicrobial peptides against *E. coli* ( $\mu\text{g/mL}$ )**

| Antimicrobial peptide | Sequence                                 | <i>E. coli</i> ATCC25922 | <i>E. coli</i> B2 |
|-----------------------|------------------------------------------|--------------------------|-------------------|
| MDAP-2                | SRDSRPVQPRVQPPPPPKQKPSIYDTPIRRPGGGRKTMYA | 128                      | 64                |
| Oncocin               | VDKPPYLPRPRPPRRIYNR-NH2                  | 8                        | 8                 |
| OM19R                 | VDKPPYLPRPRPIRRPGGR-NH2                  | 1                        | 4                 |
| OM19r                 | VDKPPYLPRPRPIRrPGGr-NH2                  | 1                        | 4                 |

**Table S4. Antibacterial effect of OM19r combined with 5 antibiotics on *E. coli* B2**

| Antibiotics  | Action site    | Combination MIC ( $\mu\text{g/mL}$ ) | MIC Breakpoints ( $\mu\text{g/mL}$ ) | Combined FIC |
|--------------|----------------|--------------------------------------|--------------------------------------|--------------|
| ceftriaxone  | cell wall      | 256 (R)                              | 4                                    | 1            |
| enrofloxacin | DNA gyrase     | 128 (R)                              | 1                                    | 1            |
| tetracycline | 30S ribosome   | 32 (R)                               | 16                                   | 0.5          |
| rifampicin   | RNA polymerase | 64 (R)                               | 16                                   | 0.75         |
| flufenicol   | 50S ribosome   | 64 (R)                               | 32                                   | 0.75         |
| gentamicin   | 30S ribosome   | 2 (S)                                | 16                                   | 0.156        |

Note: R: resistant, S: sensitive

**Table S5. Resistance spectrum of multidrug-resistant Gram-negative bacteria selected in this study**

| <b>Antibiotic(<math>\mu\text{g/mL}</math>)</b> | <b>Colistin</b> | <b>Enrofloxacin</b> | <b>Tetracycline</b> | <b>Florfenicol</b> | <b>Erythromycin</b> | <b>Kanamycin</b> | <b>Streptomycin</b> | <b>Tobramycin</b> | <b>Amikacin</b> | <b>Spectinomycin</b> | <b>Gentamicin</b> |
|------------------------------------------------|-----------------|---------------------|---------------------|--------------------|---------------------|------------------|---------------------|-------------------|-----------------|----------------------|-------------------|
| <i>E. coil</i> ATCC 25922                      | 0.25            | 1                   | 1                   | 2                  | 64                  | 1                | 4                   | 1                 | 1               | 1                    | 0.25              |
| <i>E. coil</i> B2                              | 8               | 32                  | 128                 | 256                | 256                 | 512              | 256                 | 128               | 16              | 512                  | 64                |
| <i>S. typhimurium</i> 1A                       | 64              | 32                  | 16                  | 8                  | 512                 | 256              | 2                   | 8                 | 2               | 256                  | 512               |
| <i>A. baumannii</i> JS1                        | 0.015           | 256                 | 512                 | 128                | 64                  | 64               | 512                 | 64                | 32              | 512                  | 512               |
| <i>S. dysenteriae</i> A3                       | 0.067           | 0.067               | 32                  | 4                  | 64                  | 64               | 64                  | 32                | 16              | 256                  | 16                |
| <i>K. Pneumoniae</i> JP20                      | 1               | 128                 | 512                 | 256                | 128                 | >512             | 16                  | 16                | 4               | 512                  | 128               |

**Table S6. Antibacterial effect of OM19r combined with different aminoglycosides against drug-resistant *E. coli* B2**

| <b>Antibiotic</b> | <b>MIC<sup>a</sup> (µg/mL)</b> | <b>FIC index</b> | <b>MIC<sup>b</sup> with OM19r (µg/mL)</b> | <b>Potentialiation (fold) <sup>c</sup></b> |
|-------------------|--------------------------------|------------------|-------------------------------------------|--------------------------------------------|
| kanamycin         | 512                            | 0.375            | 2                                         | 256                                        |
| gentamicin        | 64                             | 0.157            | 1                                         | 64                                         |
| streptomycin      | 256                            | 0.188            | 2                                         | 128                                        |
| tobramycin        | 64                             | 0.375            | 4                                         | 64                                         |
| spectinomycin     | 512                            | 0.375            | 2                                         | 256                                        |

a/b MICs of antibiotic in the absence or presence of 0.5×MIC OM19r .

c Degree of antibiotic potentialiation in the presence of 0.5×MIC OM19r.

**Table S7. Molecular docking results**

| Antimicrobial agents | Receptor | Binding Energy<br>(kcal/mol) | Ligand RMSD<br>(Å) |
|----------------------|----------|------------------------------|--------------------|
| OM19r                | SbmA     | -262.92                      | 204.09             |
| OM19r                | ribosome | -115.33                      | 242.11             |
| GEN                  | ribosome | -140.8                       | 288.83             |
